# Supplementary material for: DNA methylation ambiguity in the Fibrillin-1 (FBN1) CpG island shore possibly involved in Marfan syndrome
Source: PubMed Central journal article supplement (PMC7093481; doi:10.1038/s41598-020-62127-3), 2020-03-24
Supplement: 41598_2020_62127_MOESM1_ESM.pdf [file 41598_2020_62127_MOESM1_ESM.pdf]

1 **Supplementary information**

2

3 **DNA methylation ambiguity in the *Fibrillin-1 (FBNI)* CpG island shore possibly involved in**

4 **Marfan syndrome**

5

6 Yoshikazu Arai, Kazuhiro Umeyama, Natsumi Okazaki, Kazuaki Nakano, Koichiro Nishino,

7 Hiroshi Nagashima, and Jun Ohgane

8

9

10

11

12

13

14

15

16

17

18

19

20

21 **Materials and Methods**

22 **Real-time RT-PCR**

23 Total RNA from porcine fibroblast cells was extracted using the RNeasy Plus Mini Kit and RNeasy  
24 Fibrous Tissue Kit (Qiagen). First-strand cDNA synthesis was performed using a Superscript III  
25 First-strand Synthesis System (Thermo Fisher Scientific) with random hexamers. Real-time RT-  
26 PCR was performed using Premix Ex Taq (TaKaRa) with specific primers and TaqMan probes for  
27 *FBNI* mRNA (*FBNI*\_Ex10: 5'- GACCGCAAATTCCAGTC -3', *FBNI*\_Ex11: 5'-  
28 TAATCAGTGACGTTGACAG -3', and *FBNI*\_Probe: 5'- CGACCACCAGTGGAAATATCCATAT  
29 -3') and *ACTB* (*ACTB*\_F: 5'- GCCCTCCTTCTTGGGCATG -3', *ACTB*\_R: 5'-  
30 CAGCACCGTGTTGGCGTAG -3', and *ACTB*\_Probe: 5'-  
31 TCCTTCCTGATGTCCACGTCGCACTTC -3'). Data was normalized to *ACTB* expression, and  
32 gene expression levels were calculated using the  $\Delta\Delta C_t$  method.

33

34 **Luciferase assay**

35 The *FBNI* CpG island shore region of the porcine *FBNI* was amplified with specific primers  
36 (*FBNI*\_region4\_F: 5'- GAGTTGAGGCAATGGGAAGA -3', and *FBNI*\_region4\_R: 5'-  
37 TGTGTCTGGGAGGCACAGT -3') by genomic PCR. The PCR fragment was cloned into a CpG-  
38 free pCpG-L vector, which was kindly provided by Dr. Michael Rehli<sup>1</sup>, and the methylated  
39 construct was obtained using *SssI* methylase (New England BioLabs). Porcine fibroblasts were co-  
40 transfected with a reporter constructs and the pRL-TK vector by Neon Transfection System

41 (Thermo Fisher Scientific). Luciferase activities were determined using the Dual-Luciferase  
42 Reporter Assay system (Promega) 48 h after transfection. Promoter activity was normalized to  
43 Renilla luciferase activity. Independent experiments were performed three times.

44

#### 45 **Cell detachment assay**

46 To investigate the ability of cell adhesion in *FBNI* het KO and WT fibroblast cells, we performed a  
47 cell detachment assay. The cell culture methodology is described in the Materials and Methods  
48 section of the present paper. Using *FBNI* het KO (KO-239-2 and KO-239-4) and WT (WT-239-1)  
49 fibroblast cells,  $2.5 \times 10^5$  cells were cultured for 96 h before performing the cell detachment assay.  
50 Cells were washed with PBS(-) (Wako, Osaka, Japan) and then treated with 0.05% trypsin/EDTA  
51 (Wako) for 3 min. The detached cells in the supernatant were carefully collected and 0.05%  
52 trypsin/EDTA solution was added again to the culture dish to completely harvest the attached cells.  
53 The cells were counted using a Vi-CELL XR (Beckman Coulter, Pasadena, CA), and the ratio of  
54 the detached cells was calculated using the formula: detached cells (%) = number of detached cells  
55 in supernatant/total number of the cells (detached and attached cells)\*100. Six independent cell  
56 detachment assays were performed for this analysis.

57

#### 58 **Figure legends**

59 **Supplemental Figure 1. Expression level of the *FBNI* mRNA and preRNA in *FBNI***  
60 **homozygous KO fibroblast cells**

61 (a) Expression levels of *FBNI* mRNA and preRNA in WT and *FBNI* homo KO fibroblast cells was  
62 measured by RT-PCR. The position of the primer sets are described in Fig. 1. Relative expression  
63 levels were normalized to *GAPDH*. The expression levels are shown as mean  $\pm$  SD (n = 3).  
64 Statistical comparisons of the expression levels were performed using the Student's *t*-test, and  
65 statistical significance was set as  $p < 0.05$ . The gel images were cropped from different parts of the  
66 same gel (the original image is shown in the following Supplemental Figure 1a). (b) Real-time RT-  
67 PCR was performed with samples from WT and *FBNI* homo KO fibroblast cells. The amplification  
68 plots of *FBNI* mRNA (*FBNI*) and an internal control (*ACTB*) are shown in the left panel. The  
69 relative expression levels of the *FBNI* mRNA were normalized to those of *ACTB* using the  $\Delta\Delta C_t$   
70 method.

71

72 **Supplemental Figure 2. Influence of DNA methylation on the promoter activity of the *FBNI***  
73 **CpG island shore**

74 (a) *FBNI* mRNA expression in *FBNI* het KO fibroblast cells treated with 5-aza-2'-deoxycytidine  
75 (5-aza-dC). Inhibition of DNA methylation in *FBNI* het KO fibroblast cells (KO-239-2 and KO-  
76 239-4) was achieved through treatment with 0 or 5  $\mu$ M of 5-aza-dC for four days. The relative  
77 expression of *FBNI* mRNA was analyzed by RT-PCR and normalized to *GAPDH*. Data is  
78 presented as mean  $\pm$  SD (n = 3). Statistical analyses of mRNA expression were performed using the  
79 Student's *t*-test, and  $p < 0.05$  was considered as statistically significant. (b) DNA methylation of the  
80 *FBNI* CpG island shore repressed gene promoter activity. A diagram of the *FBNI* upstream region

81 and reporter constructs are shown in the left panel. The *FBNI* CpG island shore was inserted into  
82 the pCpG-L luciferase vector. Mock indicates the absence of the *FBNI* CpG island shore.  
83 Methylated and unmethylated reflects the presence and absence of *in vitro* methylation,  
84 respectively, within the *FBNI* CpG island shore by *SssI*. Open and closed circles indicate  
85 unmethylated and methylated CpG sites within the CpG island shore, respectively. Each reporter  
86 construct was transfected to porcine fibroblast cells and its luciferase activity was measured. The  
87 relative promoter activity was normalized to the activity of the co-transfected Renilla luciferase and  
88 are shown as mean  $\pm$  SD (n = 3).

89

### 90 **Supplemental Figure 3. Allele-distinguished DNA methylation analysis of porcine WT**

#### 91 **fibroblast cells**

92 (a) DNA methylation analysis of the *FBNI* CpG island shore was performed in WT fibroblast cells  
93 by sodium bisulfite sequencing. Analyzed WT fibroblast cells were produced by crossing of *FBNI*  
94 het KO and WT pigs whose WT alleles include the SNP that we identified in the *FBNI* CpG island  
95 shore in order to distinguish the two WT alleles in the WT offspring. In the parental *FBNI* het KO  
96 pig, the CpG island shore contained the thymine (T) SNP with a complementary strand that was  
97 amplified by sodium bisulfite PCR as adenine (A) in both WT and KO alleles. The parental WT pig  
98 has a cytosine (C) SNP whose complementary strand includes a guanine (G) at the same position.  
99 Thus, F1 WT offspring pigs produced by the *FBNI* het KO and WT pigs possess two WT alleles  
100 from each parent. Depending on the SNP (G or A) nucleotide in the sodium bisulfite PCR

101 fragments, the origin of the parental WT alleles were identified in the sequenced reads at P6 (early  
102 passage) and P20 (late passage). Horizontal and vertical axes indicate the position of the CpG sites  
103 (O, 2 CpGs; S, 9 CpGs; and I, 13 CpGs) and the number of sequenced reads (36 to 59 reads),  
104 respectively. White and black bars indicate unmethylated and methylated CpGs, respectively. Areas  
105 within the two dotted squares represent the shore region (S) whose methylation levels were  
106 calculated in an allele-specific manner. (b) Changes in RM allele ratios in the S region from P6 to  
107 P20 in WT fibroblast cells. Solid and dotted lines indicate RM allele ratios of the WT alleles with G  
108 or A SNPs, respectively. Calculation of RM allele ratio is described in Fig. 2.

109

110 **Supplemental Figure 4. The KO alleles exhibited larger variation in RM allele ratios than the**  
111 **WT allele in *FBNI* het KO fibroblast cells**

112 Based on the RM allele ratios in the S region of *FBNI* het KO fibroblast cells (n = 6) at P6 and P20,  
113 coefficient of variation in WT- and KO RM allele ratios was calculated using the formula: the ratio  
114 of standard deviation/average of RM allele ratio.

115

116 **Supplemental Figure 5. Cell adhesion is correlated with *FBNI* mRNA level in *FBNI* het KO**  
117 **fibroblast cells**

118 (a) Cell adhesion was analyzed in *FBNI* het KO (KO-239-2 and KO-239-4) and WT (WT-239-1)  
119 fibroblast cells. After a 3-minute treatment with trypsin/EDTA, detached cells in supernatant was  
120 carefully collected, and then attached cells in dishes were harvested by additional and complete

121 treatment with trypsin/EDTA. Experiments were performed six times for each sample and the  
122 median of the percentage of detached cells per total cells cultured is presented as a boxplot. (b)  
123 Expression levels of *FBNI* mRNA in detached *FBNI* het KO and WT fibroblast cells. The relative  
124 expression levels of the *FBNI* mRNA were normalized to *GAPDH* and shown as mean  $\pm$  SD (n =  
125 6). Statistical comparisons of the expression levels were performed using the Student's *t*-test, and  
126 statistical significance was set as  $p < 0.05$ .

127

#### 128 **Reference**

- 129 1. Klug M and Rehli M. Functional analysis of promoter CpG methylation using a CpG-free  
130 luciferase reporter vector. *Epigenetics* **1**, 127–130 (2006).

131

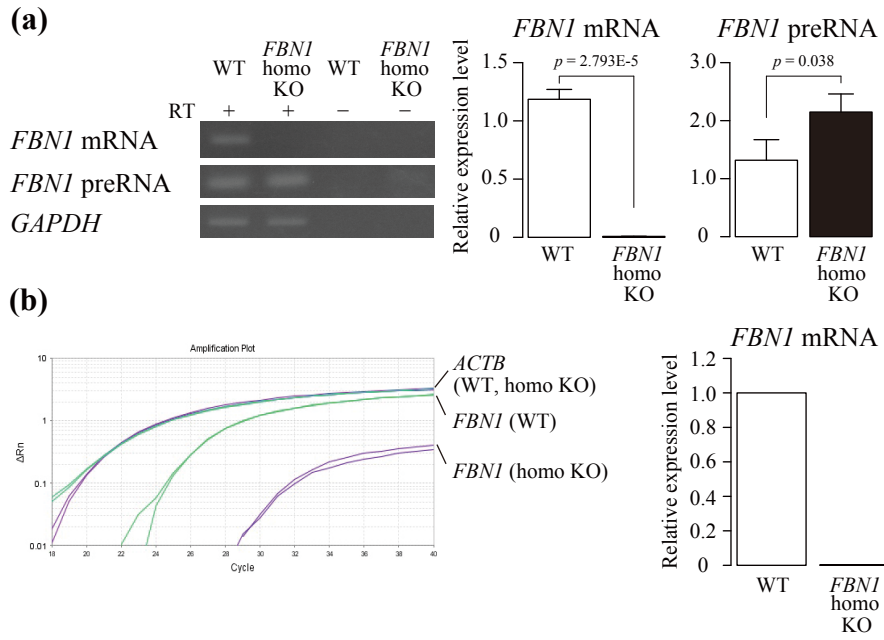

Supplemental Figure 1



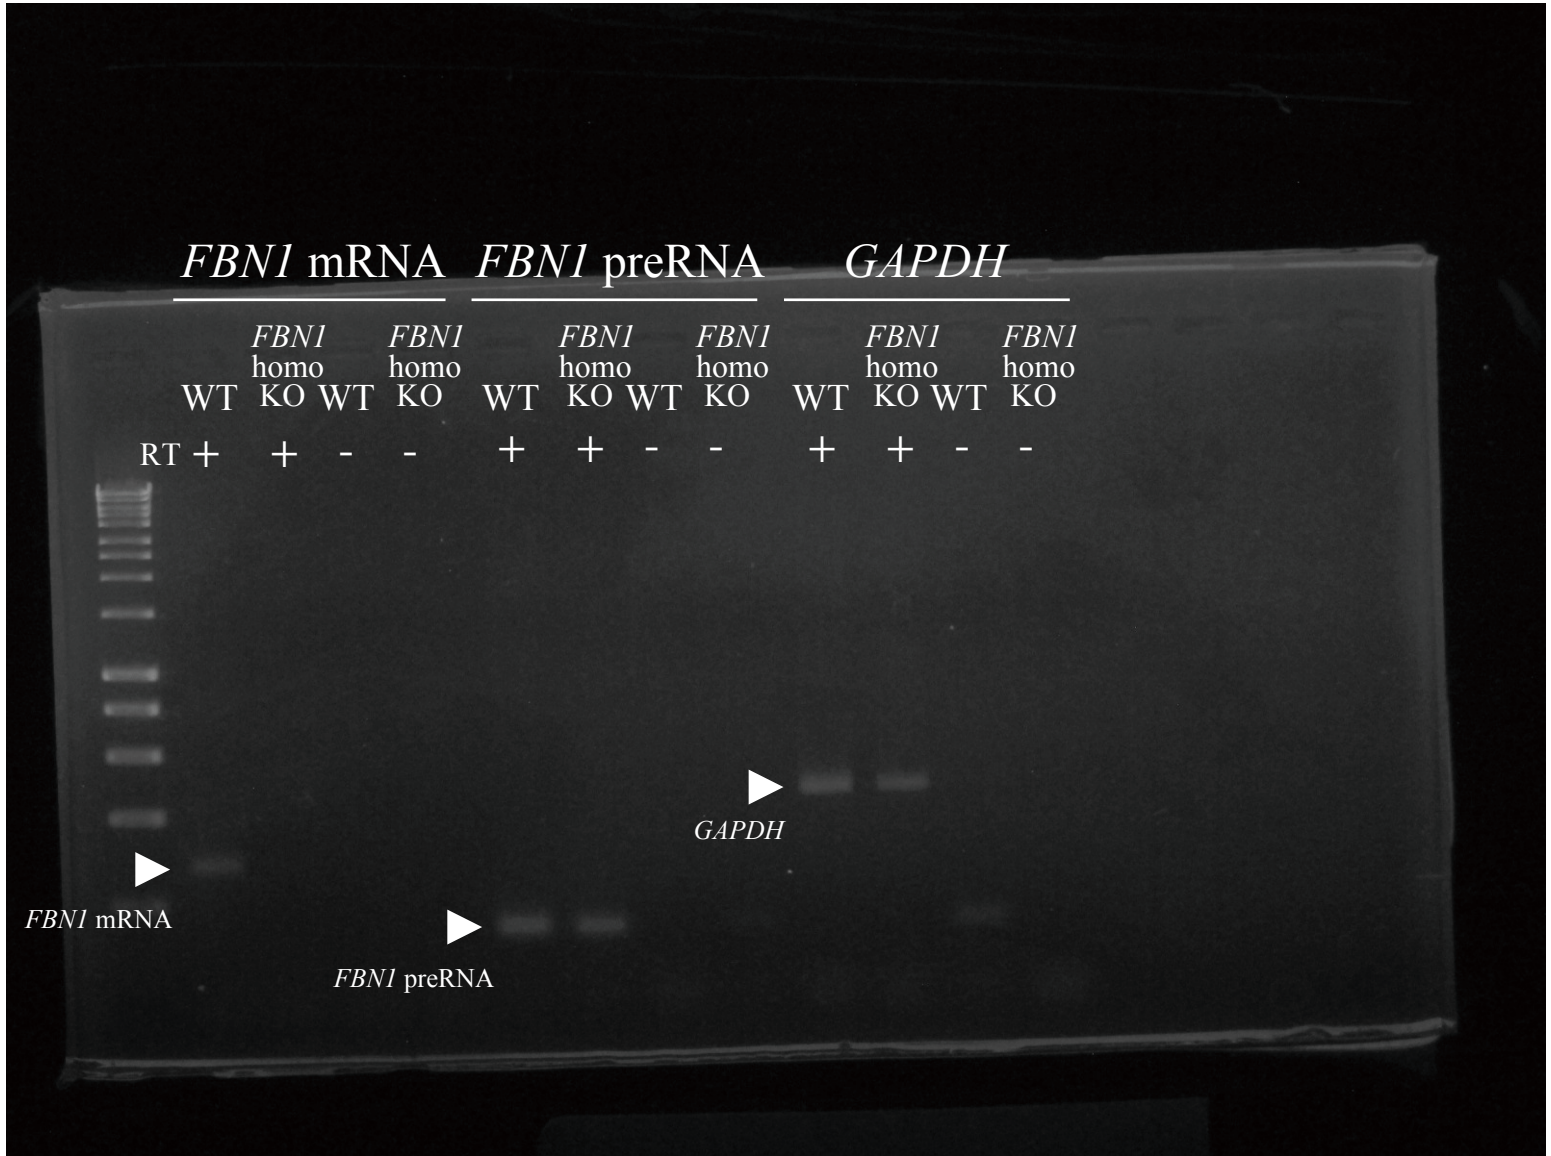

Supplemental Figure 1a

(a)

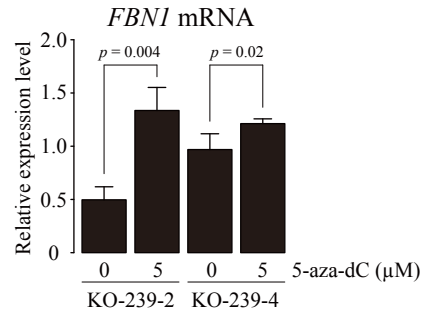

(b)

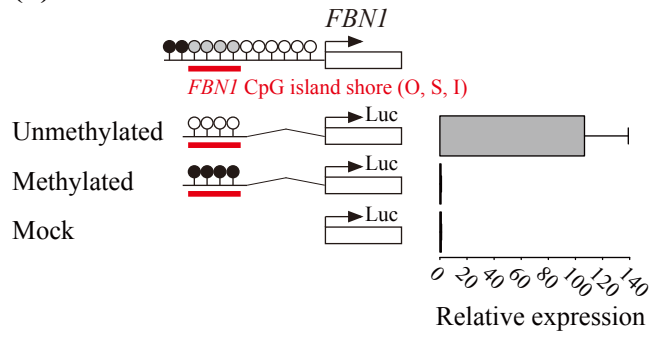

Supplemental Figure 2

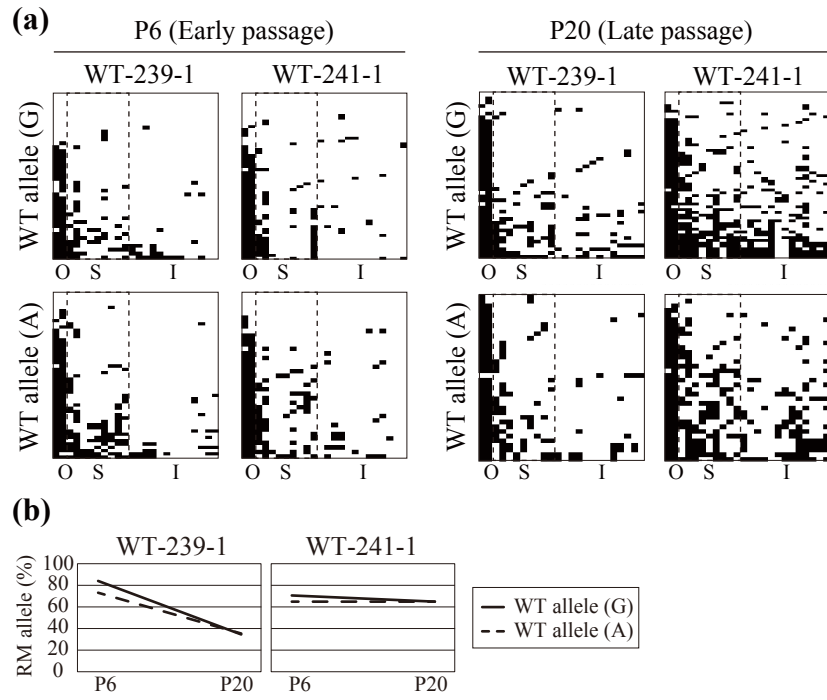

Supplemental Figure 3

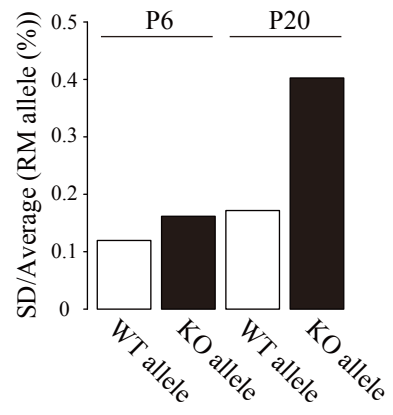

Supplemental Figure 4

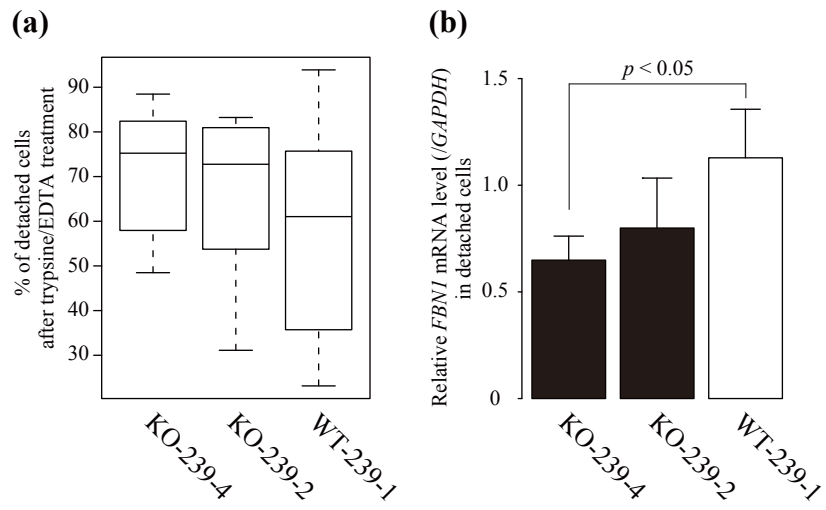

Supplemental Figure 5
